# Supplementary material for: Lactobacillus (LA-1) and butyrate inhibit osteoarthritis by controlling autophagy and inflammatory cell death of chondrocytes
Source: PubMed Central journal article supplement (PMC9619036; doi:10.3389/fimmu.2022.930511), 2022-10-17
Supplement: DataSheet_1.pdf [file DataSheet_1.pdf]

***Lactobacillus* (LA-1) and Butyrate inhibit Osteoarthritis by controlling Autophagy and Inflammatory Cell Death of Chondrocytes**

Keun-Hyung Cho<sup>1,2</sup>, Hyun Sik Na<sup>1,2</sup>, JooYeon Jhun<sup>1</sup>, Jin Seok Woo<sup>1</sup>, A Ram Lee<sup>1,2</sup>, Seung Yoon Lee<sup>1,2</sup>, Jeong Su Lee<sup>1,2</sup>, In Gyu Um<sup>1,2</sup>, Seok Jung Kim<sup>3</sup>, Sung-Hwan Park<sup>4</sup>, Mi-La Cho<sup>1,5</sup>

<sup>1</sup>Rheumatism Research Center, Catholic Research Institute of Medical Science, Catholic University of Korea, Seoul 06591, Korea

<sup>2</sup>Department of Biomedicine & Health Sciences, College of Medicine, Catholic University of Korea, Seoul 06591, Korea

<sup>3</sup>Department of Orthopedic Surgery, College of Medicine, Catholic University of Korea, Seoul 06591, Korea

<sup>4</sup>Division of Rheumatology, Department of Internal Medicine, Seoul St. Mary's Hospital, College of Medicine, Catholic University of Korea, Seoul 06591, Korea

<sup>5</sup>Department of Medical Lifescience, College of Medicine, College of Medicine, Catholic University of Korea, 222 Banpo-daero, Seocho-gu, Seoul 06591, Republic of Korea

To whom correspondence should be addressed to:

**Mi-La Cho, Ph.D.**, Rheumatism Research Center, Catholic Research Institute of Medical Science, College of Medicine, The Catholic University of Korea, Seoul 06591, Korea (Tel: 82-2-2258-7473, Fax: 82-2-2258-7473, E-mail: [iammila@catholic.ac.kr](mailto:iammila@catholic.ac.kr))

**Table 1. List of primers for real-time PCR in this study**

| <b>Gene Name</b> | <b>Forward Primer</b>   | <b>Reverse Primer</b>  |
|------------------|-------------------------|------------------------|
| <b>MMP1</b>      | CTGAAGGTGATGAAGCAGCC    | AGTCCAAGAGAATGGCCGAG   |
| <b>MMP3</b>      | CTCACAGACCTGACTCGGTT    | CACGCCTGAAGGAAGAGATG   |
| <b>MMP13</b>     | CTATGGTCCAGGAGATGAAG    | AGAGTCTTGCCTGTATCCTC   |
| <b>TIMP1</b>     | AATTCCGACCTCGTCATCAG    | TGCAGTTTTCCAGCAATGAG   |
| <b>TIMP3</b>     | CTGACAGGTCGCGTCTATGA    | GGCGTAGTGTTTGGACTGGT   |
| <b>NFκB</b>      | AACAGAGAGGATTTTCGTTTCCG | GGACTTCGAGCAAGAGATGG   |
| <b>iNOS</b>      | CCTGAGCTCTTCGAAATCCCA   | CCCGAAACCACTCGTATTTGG  |
| <b>RIPK1</b>     | GACGAAGCCAACTACCATCTT   | TCTCCTTTCCTCCTCTCTGTT  |
| <b>MLKL</b>      | GCAAGCTGGTGGCTGTGAAGC   | TTCATCCACAGAGGGCCGCA   |
| <b>β-actin</b>   | GGACTTCGAGCAAGAGATGG    | TGTGTTGGCGTACAGGTCTTTG |

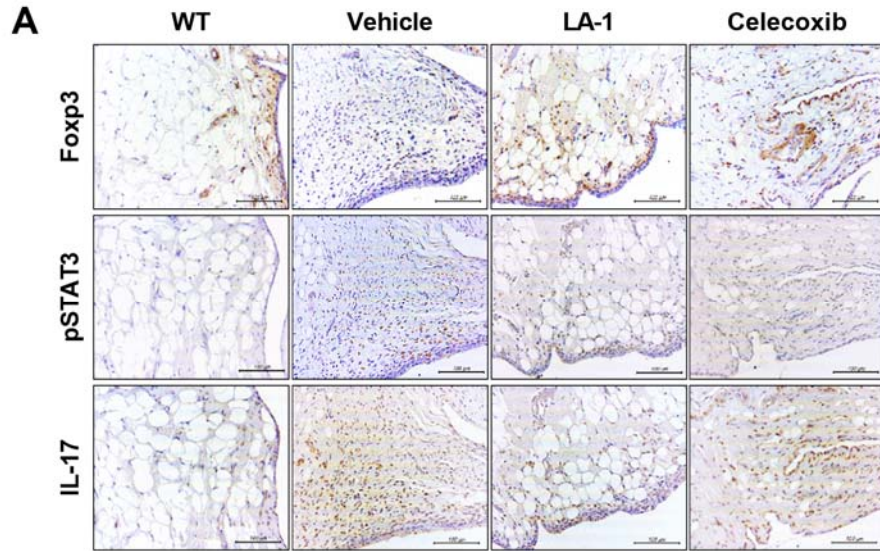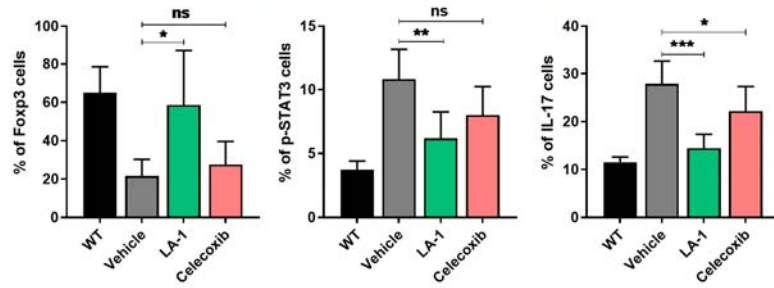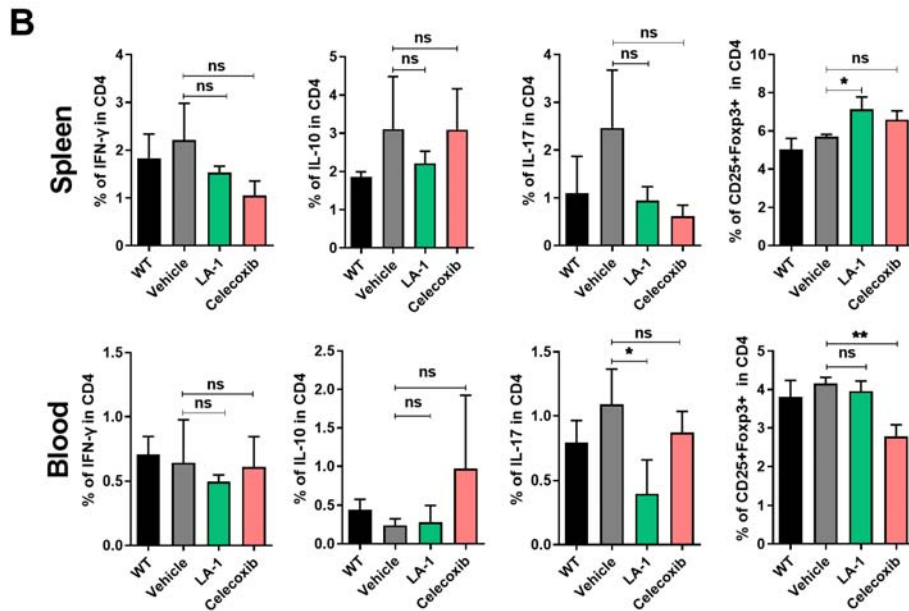

**Supplementary Figure 1. Lactobacillus regulates the expression of inflammatory and regulatory T cells.** (A) FOXP3, p-STAT3, and IL-17 expression determined immunohistochemically in the synovium of indicated group. (B) Bar graphs show average % of IFN- $\gamma$ , IL-10, and IL-17 positive CD4<sup>+</sup> T cells of spleen (top) and blood (bottom) of indicated group. (C) Bar graphs show average % of CD25<sup>high</sup>FOXP3<sup>high</sup>CD4<sup>+</sup> T cells (Treg) of spleen (top) and blood (bottom) of indicated group. Data are means  $\pm$  SD (\* $p$  < 0.05, \*\* $p$  < 0.01, \*\*\*\* $p$  < 0.001).

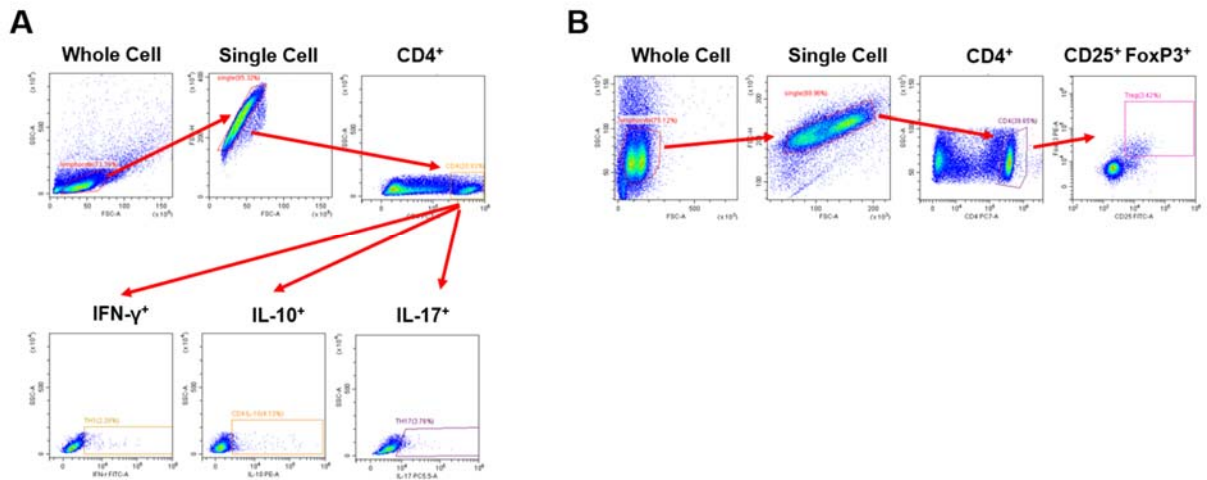

**Supplementary Figure 2. An example of gating strategy for flow cytometry. (A) Gating strategy for IFN- $\gamma$ <sup>+</sup>, IL-10<sup>+</sup>, and IL-17<sup>+</sup> CD4<sup>+</sup> T cells. (B) Gating strategy for CD4<sup>+</sup>CD25<sup>+</sup>FoxP3<sup>+</sup> cells (Tregs).**

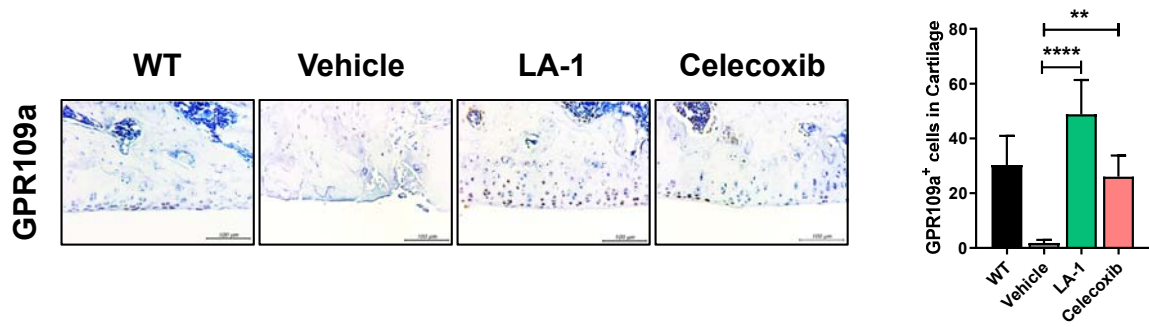

**Supplementary Figure 3. Regulation of GPR109a expression by LA-1.** Representative images show the expression of GPR109a and bar graph shows GPR109a positive cell number in the indicated group.

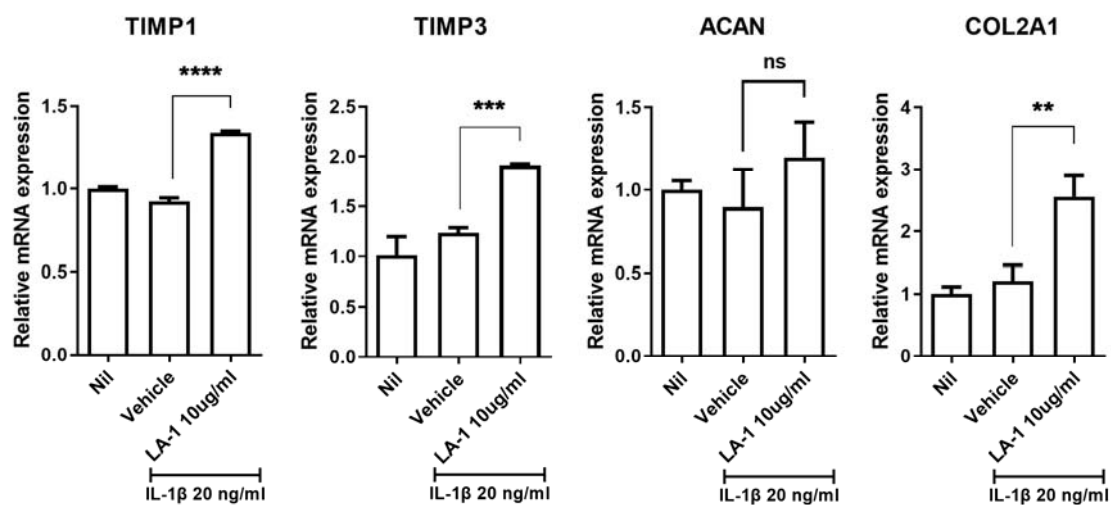

**Supplementary Figure 4. Lactobacillus regulate the expression of anabolic factors & ECM - related gene.** Bar graphs show the mRNA expression level of TIMP1, TIMP3, ACAN, and COL2A1 in the human chondrocyte of indicated group. Data are means  $\pm$  SD (\*\* $p < 0.01$ , \*\*\* $p < 0.005$ , \*\*\*\* $p < 0.001$ ).

**A**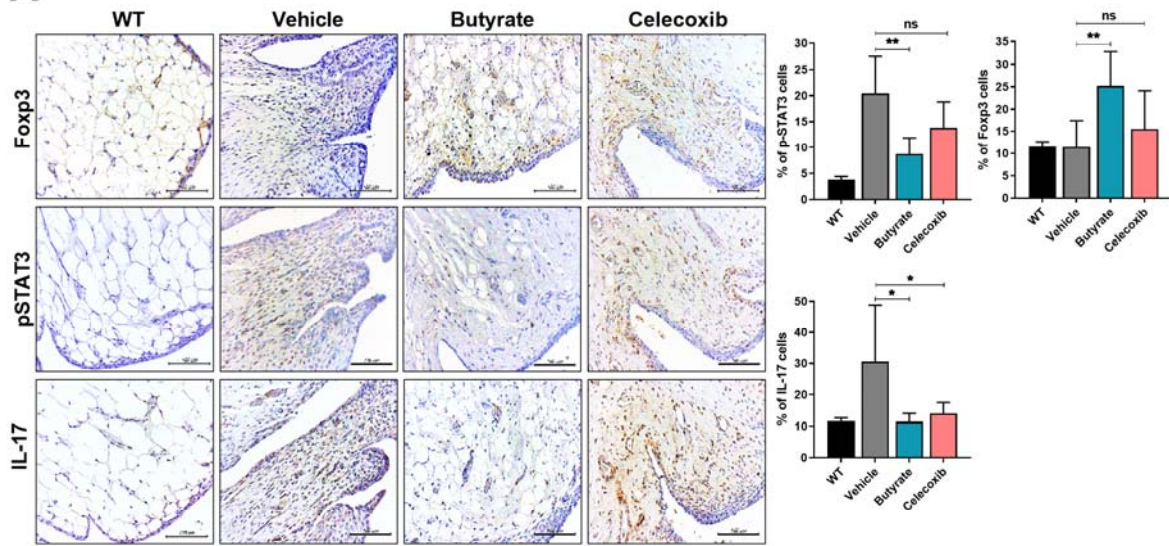**B**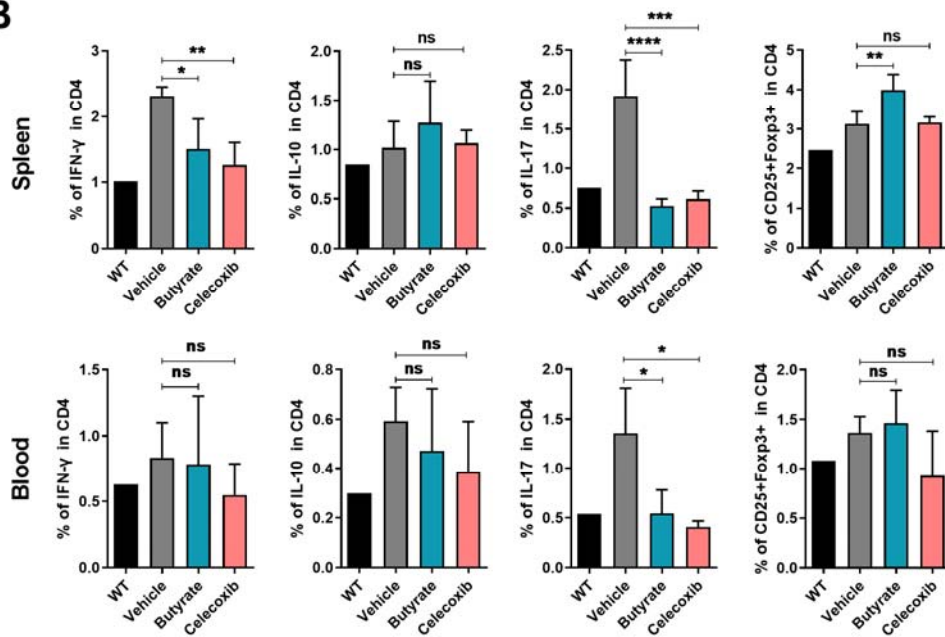



**Supplementary Figure 5. Butyrate regulates the expression of inflammatory and regulatory T cells.** (A) FOXP3, p-STAT3, and IL-17 expression determined immunohistochemically in the synovium of indicated group. (B) Bar graphs show average % of IFN- $\gamma$ , IL-10, and IL-17 positive CD4<sup>+</sup> T cells of spleen (top) and blood (bottom) of indicated group. (C) Bar graphs show average % of CD25<sup>high</sup>FOXP3<sup>high</sup>CD4<sup>+</sup> T cells (Treg) of spleen (top) and blood (bottom) of indicated group. Data are means  $\pm$  SD (\* $p$  < 0.05, \*\* $p$  < 0.01).

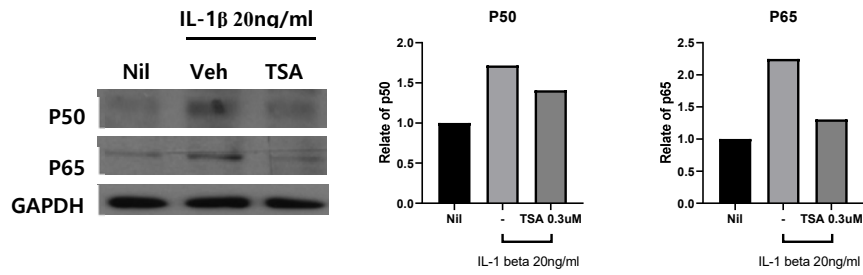

**Supplementary Figure 6. Regulatory effect of HDAC inhibitor in the expression of NF-κB.**

Representative images show the expression of P50 and P65, and bar graphs show quantification of them in the indicated group.

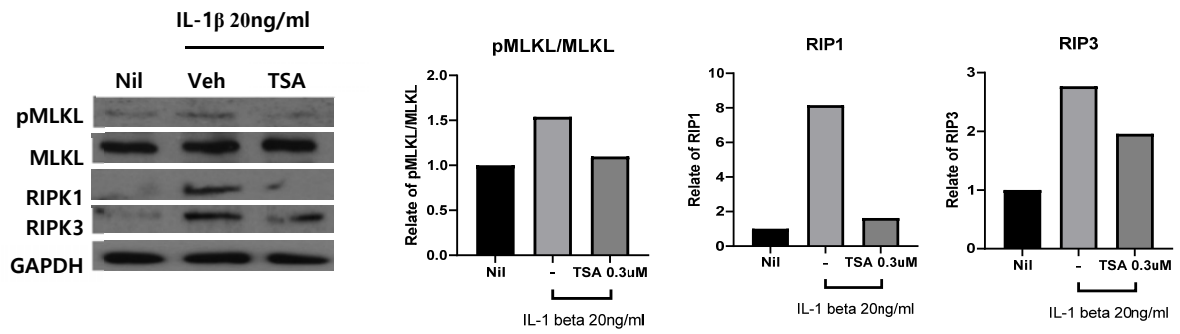

**Supplementary Figure 7. HDAC inhibitor inhibit inflammatory cell death.** Representative images show the expression of pMLKL, MLKL, RIPK1, and RIPK3, and bar graphs show quantification of them in the indicated group.
